# Supplementary material
Source: PubMed Central journal article supplement (PMC8109253)
Supplement: NIHMS1699419-supplement-supplementary_data.pdf [file NIHMS1699419-supplement-supplementary_data.pdf]

## SUPPLEMENTARY DATA

### CT-scan based liver and spleen volume measurement as a prognostic indicator for patients with cirrhosis

Milan Patel, MD, MBA<sup>1</sup>, Mark Tann, MD<sup>2</sup>, and Suthat Liangpunsakul, MD MPH<sup>3,4,5</sup>

<sup>1</sup>Department of Medicine, Virginia Commonwealth University, Richmond, VA,

<sup>2</sup>Department of Radiology and Imaging Sciences, Indiana University School of Medicine; Indianapolis, IN,

<sup>3</sup>Division of Gastroenterology and Hepatology, Indiana University School of Medicine, Indianapolis, IN,

<sup>4</sup>Roudebush Veterans Administration Medical Center, Indianapolis, IN, <sup>5</sup>Department of Biochemistry and Molecular Biology, Indiana University School of Medicine, Indianapolis, IN

#### CORRESPONDENCE:

Mark Tann, MD  
Professor of Clinical Radiology and Imaging Sciences  
Department of Radiology and Imaging Sciences  
550 N. University Blvd, UH 0655  
Indianapolis, IN 46202  
Email: matann@iupui.edu

Suthat Liangpunsakul, MD, MPH  
Professor of Medicine, Biochemistry and Molecular Biology  
Division of Gastroenterology and Hepatology  
Indiana University School of Medicine  
550 N. University Blvd, UH 4100  
Indianapolis, IN 46202  
Email: sliangpu@iupui.edu

**Supplementary Table 1:** Baseline characteristics, laboratory values, and liver and splenic volume measurements stratified by Child Pugh Classification.

| <b>Variables</b>                                             | <b>Child Class A<br/>(N=202)</b> | <b>Child Class B<br/>(N=292)</b> | <b>Child Class C<br/>(N=62)</b> | <b>p-value</b> |
|--------------------------------------------------------------|----------------------------------|----------------------------------|---------------------------------|----------------|
| Age (Yrs)                                                    | 56.4±10.4                        | 55.7±10.1                        | 54.8±9.3                        | 0.5314         |
| Gender (Men, n %)                                            |                                  |                                  |                                 |                |
| Race (Whites, n %)                                           |                                  |                                  |                                 |                |
| Body weight (Kg)                                             | 85.4±19.2                        | 87.5±21.6                        | 90.7±25.6                       | 0.2053         |
| Height (cm)                                                  | 169.7±13.1                       | 171.3±13.5                       | 171.3±9.7                       | 0.3927         |
| Body mass index (kg/m <sup>2</sup> )                         | 29.4±6.3                         | 30.6±13.7                        | 30.9±8.3                        | 0.4053         |
| White blood cell counts (x10 <sup>3</sup> /mm <sup>3</sup> ) | 5.6±3.5                          | 5.5±3.0                          | 7.6±3.8                         | <0.0001        |
| Hemoglobin (g/dl)                                            | 13.4±6.2                         | 12.2±7.7                         | 11.3±2.2                        | 0.0166         |
| Platelet counts (x10 <sup>3</sup> /mm <sup>3</sup> )         | 122.1±66.6                       | 106.8±86.7                       | 95.1±55.2                       | 0.0216         |
| Blood urea nitrogen (mg/dl)                                  | 14.5±8.8                         | 14.2±10.9                        | 20.4±23.9                       | 0.0016         |
| Creatinine (mg/dl)                                           | 1.2±1.5                          | 1.0±1.1                          | 1.4±2.7                         | 0.0870         |
| Total bilirubin (mg/dl)                                      | 1.2±0.5                          | 2.4±2.1                          | 7.4±6.6                         | <0.0001        |
| Alanine aminotransferase (ALT, U/L)                          | 48.4±44.7                        | 49.7±56.0                        | 55.2±65.4                       | 0.4997         |
| Aspartate aminotransferase (AST, U/L)                        | 55.2±45.2                        | 76.7±64.9                        | 101.2±97.3                      | 0.0006         |
| Alkaline phosphatase (ALP, U/L)                              | 110.9±70.7                       | 154.0±164.3                      | 164.0±192.8                     | 0.0005         |
| Albumin (g/dl)                                               | 3.6±0.5                          | 2.8±0.5                          | 2.4±0.5                         | <0.0001        |
| Total protein (g/dl)                                         | 7.6±5.2                          | 6.9±0.9                          | 6.6±1.0                         | 0.0101         |
| International normalized ratio (INR)                         | 1.2±0.1                          | 1.6±1.5                          | 4.5±20.3                        | 0.0022         |
| MELD scores                                                  | 8.4±5.0                          | 11.3±6.0                         | 21.0±1.0                        | <0.0001        |
| <b>Liver volume without body weight adjustment</b>           |                                  |                                  |                                 |                |
| Total liver volume (TLV, cm <sup>3</sup> )                   | 1754.0±562.3                     | 1621.4±541.0                     | 1464.3±583.5                    | 0.0007         |
| Functional liver volume (FLV, cm <sup>3</sup> )              | 1676.9±573.4                     | 1576.7±527.6                     | 1424.9±565.2                    | 0.0061         |
| Segment 1 volume (cm <sup>3</sup> )                          | 48.2±47.5                        | 49.0±48.6                        | 43.6±36.7                       | 0.7071         |
| Segment 2 volume (cm <sup>3</sup> )                          | 271.4±266.8                      | 249.1±112.8                      | 244.5±155.8                     | 0.4225         |
| Segment 3 volume (cm <sup>3</sup> )                          | 209.0±175.4                      | 179.0±115.6                      | 143.3±97.2                      | 0.0016         |
| Segment 4 volume (cm <sup>3</sup> )                          | 262.2±150.9                      | 251.2±125.9                      | 244.8±234.4                     | 0.3214         |
| Segment 5 volume (cm <sup>3</sup> )                          | 255.6±170.5                      | 223.8±123.3                      | 207.4±107.2                     | 0.0058         |

|                                                               |             |             |             |         |
|---------------------------------------------------------------|-------------|-------------|-------------|---------|
| Segment 6 volume (cm <sup>3</sup> )                           | 177.6±109.1 | 158.4±119.5 | 145.9±120.8 | 0.3885  |
| Segment 7 volume (cm <sup>3</sup> )                           | 263.7±112.8 | 242.2±128.0 | 228.8±111.8 | 0.1180  |
| Segment 8 volume (cm <sup>3</sup> )                           | 242.7±100.0 | 227.1±111.1 | 202.1±100.1 | 0.0236  |
| <b>Liver volume with body weight adjustment</b>               |             |             |             |         |
| Total volume:body weight (cm <sup>3</sup> :kg)                | 21.1±7.1    | 19.5±10.3   | 17.2±8.7    | 0.0023  |
| functional volume:body weight (cm <sup>3</sup> :kg)           | 20.2±7.1    | 19.0±10.0   | 16.7±8.4    | 0.0103  |
| Segment 1:BW (cm <sup>3</sup> /kg)                            | 0.6±0.6     | 0.6±0.6     | 0.5±0.4     | 0.4929  |
| Segment 2:BW (cm <sup>3</sup> /kg)                            | 3.2±2.5     | 3.0±2.0     | 2.9±2.4     | 0.5596  |
| Segment 3:BW (cm <sup>3</sup> /kg)                            | 2.5±2.1     | 2.1±1.9     | 1.7±1.3     | 0.0053  |
| Segment 4:BW (cm <sup>3</sup> /kg)                            | 3.2±1.9     | 3.0±2.0     | 2.8±2.6     | 0.2142  |
| Segment 5:BW (cm <sup>3</sup> /kg)                            | 3.1±2.0     | 2.7±1.8     | 2.4±1.4     | 0.0053  |
| Segment 6:BW (cm <sup>3</sup> /kg)                            | 2.1±1.3     | 2.9±1.5     | 1.7±2.0     | 0.2714  |
| Segment 7:BW (cm <sup>3</sup> /kg)                            | 3.2±1.5     | 2.9±1.9     | 2.7±1.5     | 0.0623  |
| Segment 8:BW (cm <sup>3</sup> /kg)                            | 2.0±1.2     | 2.7±1.5     | 2.3±1.3     | 0.0102  |
| <b>Splenic volume with and without body weight adjustment</b> |             |             |             |         |
| Total splenic volume (cm <sup>3</sup> )                       | 676.0±440.7 | 871.8±545.1 | 831.7±467.0 | 0.0001  |
| Functional splenic volume (cm <sup>3</sup> )                  | 655.3±427.8 | 843.7±529.1 | 808.8±455.1 | 0.0001  |
| Total splenic volume:BW (cm <sup>3</sup> /kg)                 | 7.9±5.0     | 10.5±8.1    | 9.3±4.8     | 0.0002  |
| Functional splenic volume:BW (cm <sup>3</sup> /kg)            | 7.6±4.9     | 10.1±7.8    | 9.0±4.7     | 0.0002  |
| Total liver to spleen ratio                                   | 4.0±2.9     | 2.8±3.5     | 2.3±1.5     | <0.0001 |
| Functional liver to spleen ratio                              | 3.9±2.8     | 2.8±3.5     | 2.3±1.5     | <0.0001 |

**Supplementary Table 2:** Baseline characteristics, laboratory values, and liver volume measurements stratified by outcomes during follow up.

| <b>Variables</b>                                                | <b>Alive<br/>(N=316)</b> | <b>Transplanted<br/>(N=111)</b> | <b>Dead<br/>(N=126)</b> | <b>p-value</b> |
|-----------------------------------------------------------------|--------------------------|---------------------------------|-------------------------|----------------|
| Age (Yrs)                                                       | 55.7±10.1                | 53.4±10.0                       | 58.3±9.7                | 0.0006         |
| Gender (Men, n %)                                               |                          |                                 |                         | 0.3758         |
| Race (Whites, n %)                                              |                          |                                 |                         | 0.5741         |
| Body weight (Kg)                                                | 87.2±20.5                | 88.7±19.8                       | 85.6±24.3               | 0.5484         |
| Height (cm)                                                     | 170.2±13.6               | 172.6±14.0                      | 170.3±10.4              | 0.2293         |
| Body mass index (kg/m <sup>2</sup> )                            | 30.6±13.0                | 30.1±8.5                        | 29.4±7.4                | 0.6132         |
| White blood cell counts<br>(x10 <sup>3</sup> /mm <sup>3</sup> ) | 5.7±3.0                  | 5.2±4.1                         | 6.4±3.5                 | 0.0264         |
| Hemoglobin (g/dl)                                               | 12.6±3.0                 | 12.0±2.4                        | 12.7±11.2               | 0.6358         |
| Platelet counts (x10 <sup>3</sup> /mm <sup>3</sup> )            | 120.5±84.5               | 88.6±44.4                       | 107.5±77.0              | 0.0021         |
| Blood urea nitrogen (mg/dl)                                     | 14.2±10.6                | 14.1±7.6                        | 17.9±18.8               |                |
| Creatinine (mg/dl)                                              | 1.1±1.4                  | 1.0±0.9                         | 1.3±2.0                 | 0.3689         |
| Total bilirubin (mg/dl)                                         | 2.2±3.0                  | 2.6±1.9                         | 3.7±4.7                 | <0.0001        |
| Alanine aminotransferase<br>(ALT, U/L)                          | 56.2±106.7               | 53.6±63.4                       | 48.0±34.2               | 0.6753         |
| Aspartate aminotransferase<br>(AST, U/L)                        | 77.2±134.2               | 78.5±71.8                       | 78.9±48.6               | 0.9875         |
| Alkaline phosphatase (ALP,<br>U/L)                              | 125.1±96.1               | 142.7±92.7                      | 139.1±143.1             | 0.2387         |
| Albumin (g/dl)                                                  | 3.1±0.6                  | 3.0±0.7                         | 2.8±0.6                 | <0.0001        |
| Total protein (g/dl)                                            | 7.2±4.2                  | 7.0±0.9                         | 6.9±1.0                 | 0.5408         |
| International normalized ratio<br>(INR)                         | 1.3±0.8                  | 2.9±15.3                        | 1.5±0.5                 | 0.1150         |
| MELD scores                                                     | 10.4±6.0                 | 12.2±7.1                        | 14.1±8.6                | <0.0001        |
|                                                                 |                          |                                 |                         |                |
| Total liver volume (TLV, cm <sup>3</sup> )                      | 1736.4±610.4             | 1514.8±534.0                    | 1510.6±568.3            | <0.0001        |
| Functional liver volume (FLV,<br>cm <sup>3</sup> )              | 1676.4±602.6             | 1482.9±490.0                    | 1468.0±558.6            | 0.0003         |
| Segment 1 volume (cm <sup>3</sup> )                             | 45.9±49.1                | 42.0±42.4                       | 49.7±50.0               | 0.4803         |
| Segment 2 volume (cm <sup>3</sup> )                             | 257.5±126.0              | 278.2±336.4                     | 242.2±138.2             | 0.3453         |

|                                                               |             |             |             |        |
|---------------------------------------------------------------|-------------|-------------|-------------|--------|
| Segment 3 volume (cm <sup>3</sup> )                           | 201.9±157.0 | 162.7±104.1 | 159.8±113.4 | 0.0031 |
| Segment 4 volume (cm <sup>3</sup> )                           | 261.0±153.0 | 235.4±126.3 | 227.9±179.1 | 0.0804 |
| Segment 5 volume (cm <sup>3</sup> )                           | 248.1±155.6 | 206.5±118.0 | 206.4±113.8 | 0.0029 |
| Segment 6 volume (cm <sup>3</sup> )                           | 175.2±146.8 | 147.8±97.4  | 167.4±238.6 | 0.3244 |
| Segment 7 volume (cm <sup>3</sup> )                           | 268.4±136.7 | 226.6±104.6 | 228.4±111.3 | 0.0009 |
| Segment 8 volume (cm <sup>3</sup> )                           | 245.2±105.1 | 216.8±100.9 | 208.4±97.6  | 0.009  |
|                                                               |             |             |             |        |
| Total volume:body weight (cm <sup>3</sup> :kg)                | 20.7±9.2    | 17.7±7.7    | 18.5±7.3    | 0.0017 |
| functional volume:body weight (cm <sup>3</sup> :kg)           | 20.0±9.1    | 17.3±7.2    | 17.9±7.1    | 0.0041 |
| Segment 1:BW (cm <sup>3</sup> /kg)                            | 0.5±0.6     | 0.5±0.5     | 0.6±0.7     | 0.1398 |
| Segment 2:BW (cm <sup>3</sup> /kg)                            | 3.1±1.9     | 3.2±3.1     | 3.0±1.9     | 0.8085 |
| Segment 3:BW (cm <sup>3</sup> /kg)                            | 2.4±2.2     | 1.9±1.3     | 2.0±1.4     | 0.0060 |
| Segment 4:BW (cm <sup>3</sup> /kg)                            | 3.1±2.1     | 2.7±1.7     | 2.8±2.1     | 0.0868 |
| Segment 5:BW (cm <sup>3</sup> /kg)                            | 2.9±1.9     | 2.4±1.5     | 2.5±1.3     | 0.0047 |
| Segment 6:BW (cm <sup>3</sup> /kg)                            | 2.1±1.6     | 1.7±1.3     | 2.0±2.6     | 0.2989 |
| Segment 7:BW (cm <sup>3</sup> /kg)                            | 3.2±1.7     | 2.7±1.4     | 2.8±1.4     | 0.0042 |
| Segment 8:BW (cm <sup>3</sup> /kg)                            | 2.9±1.3     | 2.5±1.3     | 2.5±1.2     | 0.0037 |
| <b>Splenic volume with and without body weight adjustment</b> |             |             |             |        |
| Total splenic volume (cm <sup>3</sup> )                       | 778.9       | 946.9±594.6 | 720.5±451.5 | 0.0015 |
| Functional splenic volume (cm <sup>3</sup> )                  | 754.6       | 916.2±576.7 | 698.8±438.8 | 0.0017 |
| Total splenic volume:BW (cm <sup>3</sup> /kg)                 | 9.3±7.6     | 10.8±6.5    | 18.5±7.3    | 0.0017 |
| Functional splenic volume:BW (cm <sup>3</sup> /kg)            | 9.0±7.4     | 10.4±6.3    | 17.9±7.1    | 0.0308 |
| Total liver to spleen ratio                                   | 3.3±2.9     | 2.2±1.5     | 3.5±4.5     | 0.0017 |
| Functional liver to spleen ratio                              | 3.3±2.9     | 2.2±1.5     | 3.5±4.5     | 0.0024 |

## Figure legends

**Supplementary Figure 1:** Schematic diagram on patient selection into the study cohort

**Supplementary Fig 2:** Schematic illustration demonstrating semi-automated liver and spleen volume measurement

**Supplementary Fig 3:** Linear regression analysis illustrating the inter-observer agreement between 2 readers (data shown are the reading of liver volume)

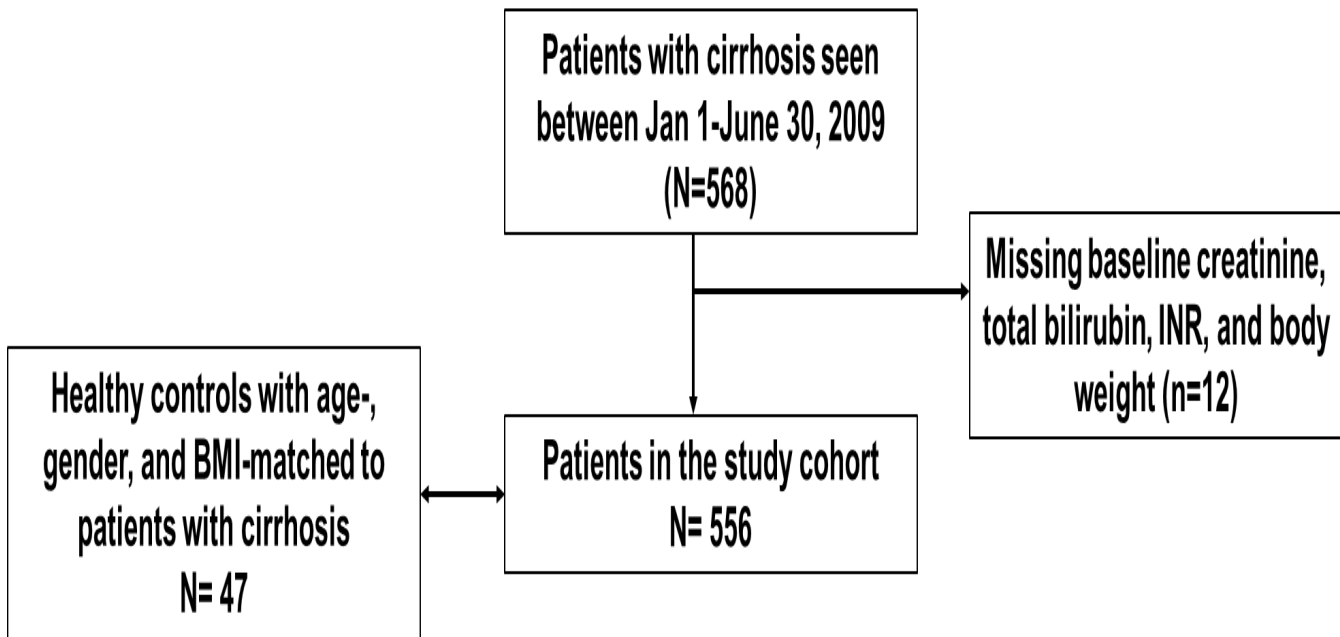

**Supplementary Figure 1: Schematic diagram on patient selection into the study cohort**

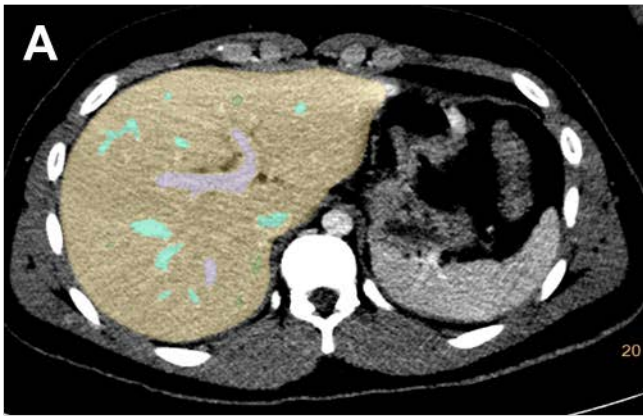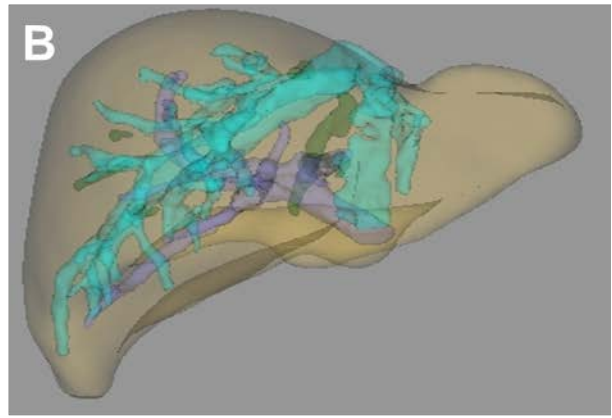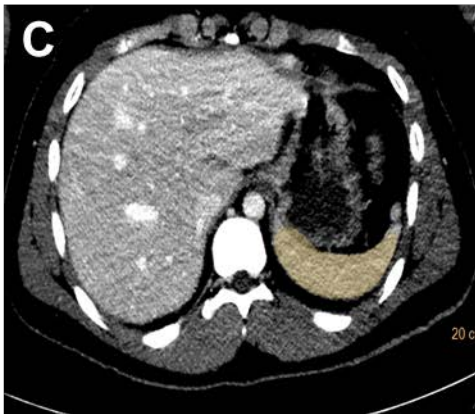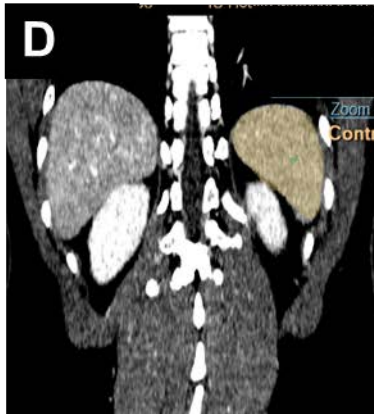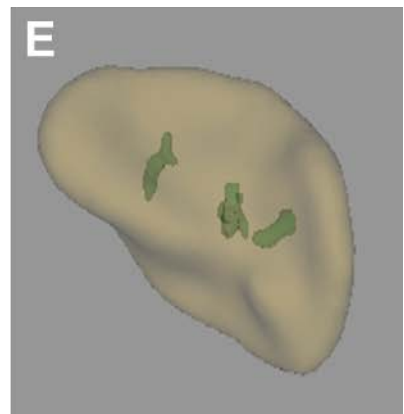

**Supplementary Fig 2: Schematic illustration demonstrating semi-automated liver and spleen volume measurement**



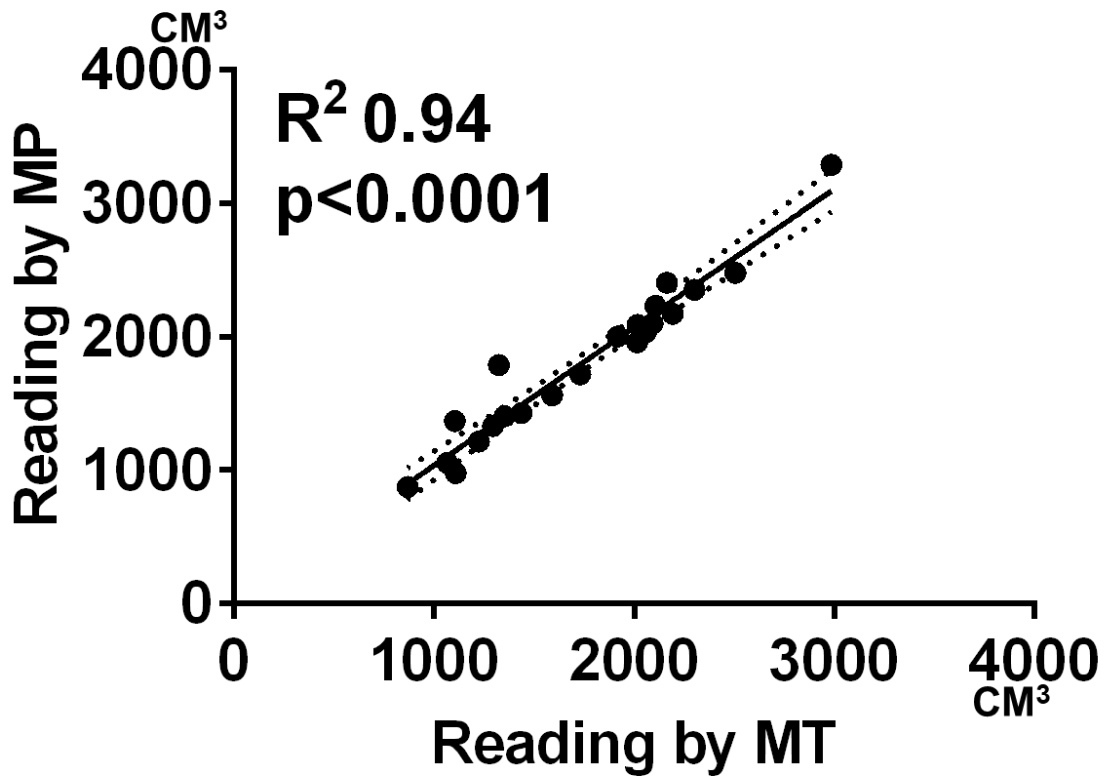

Supplementary Fig 3: Linear regression analysis illustrating the inter-observer agreement between 2 readers (data shown are the reading of liver volume)
